# Supplementary material
Source: PubMed Central journal article supplement (PMC4084423)
Supplement: 1408905111_pnas.1408905111.sapp.pdf [file 1408905111_pnas.1408905111.sapp.pdf]

## Supporting Information Appendix:

### Synthesis and Photophysical Studies of Self-Assembled Multicomponent Supramolecular Coordination Prisms Bearing Porphyrin Faces

Yanhui Shi,<sup>\*,†,‡</sup> Irene Sánchez-Molina,<sup>‡</sup> Changsheng Cao,<sup>†</sup> Timothy R. Cook,<sup>‡</sup> and Peter J. Stang<sup>\*,‡</sup>

<sup>†</sup>*School of Chemistry and Chemical Engineering and Jiangsu Key Laboratory of Green Synthetic Chemistry for Functional Materials, Jiangsu Normal University, Xuzhou, Jiangsu 221116, PR China*

<sup>‡</sup>*Department of Chemistry, University of Utah, 315 South 1400 East, RM 2020, Salt Lake City, Utah 84112, United States*

Corresponding Author Info: Peter J. Stang, Department of Chemistry, University of Utah, 315 South 1400 East, RM 2020, Salt Lake City, Utah 84112; stang@chem.utah.edu; Yanhui Shi, School of Chemistry and Chemical Engineering, Jiangsu Normal University, Xuzhou, Jiangsu 221116, PR China; yhshi@jsnu.edu.cn

#### Table of Contents

Pages S2-S6: <sup>1</sup>H NMR spectra of **4a-e** and **5a-e**.

Pages S7-S10: <sup>31</sup>P NMR spectra of **4a-e** and **5a-e**.

Pages S11-S15: ESI-MS spectra of **4a-e** and **5a-e**.

Page S16: Absorption and emission spectra of **4a**, **4b**, **4c**, **4d** and **4e** in acetone

Page S17: Absorption and emission spectra of **5a**, **5b**, **5c**, **5d** and **5e** in acetone

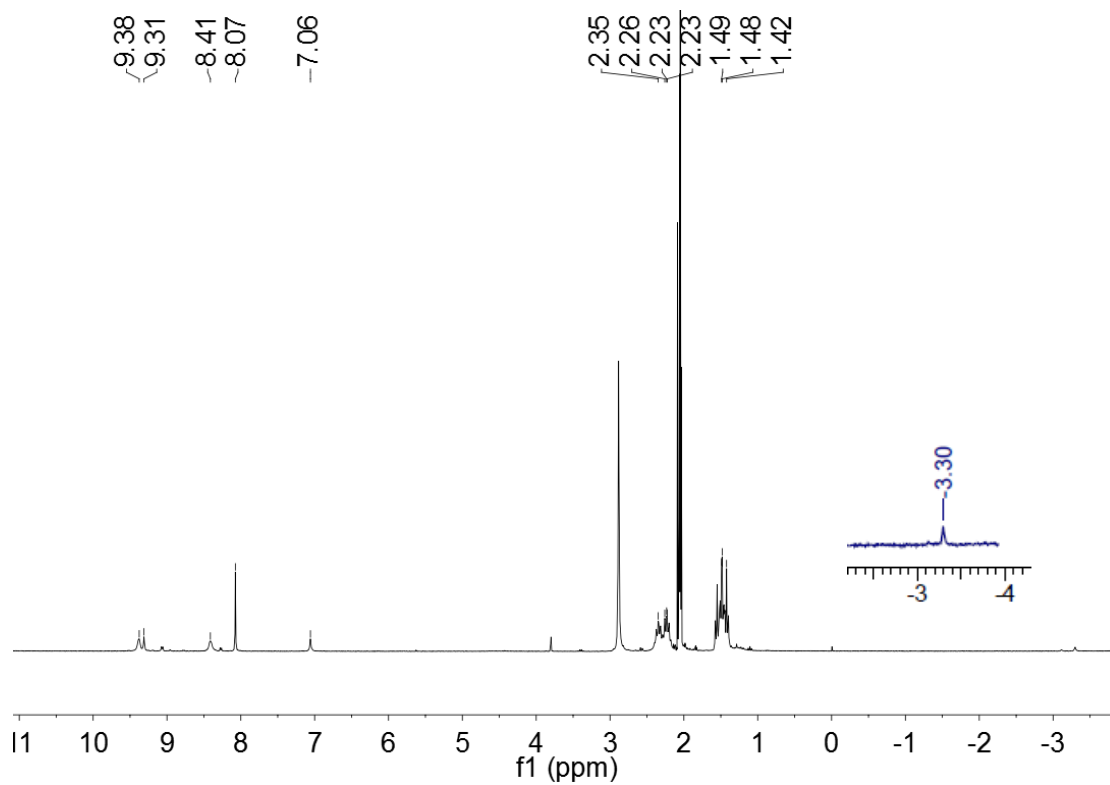

**Figure S1.**  $^1\text{H}$  NMR (acetone- $d_6$ , 300 MHz) spectrum of **4a**

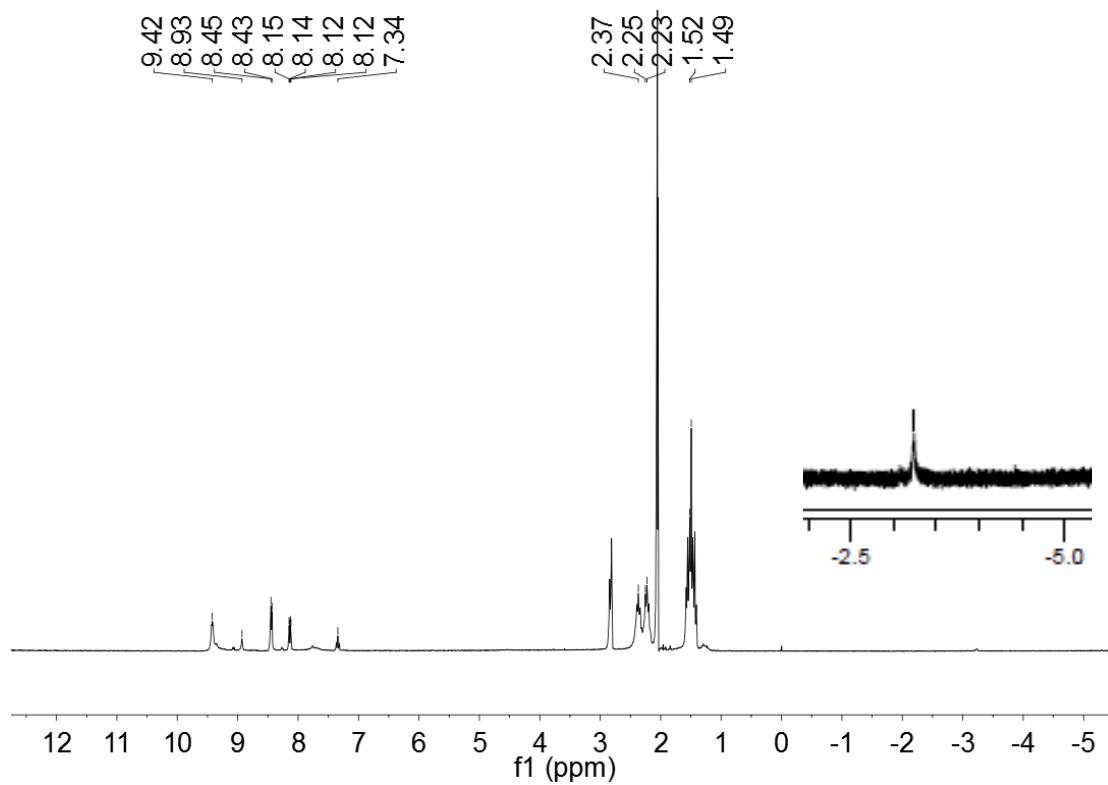

**Figure S2.**  $^1\text{H}$  NMR (acetone- $d_6$ , 300 MHz) spectrum of **4b**

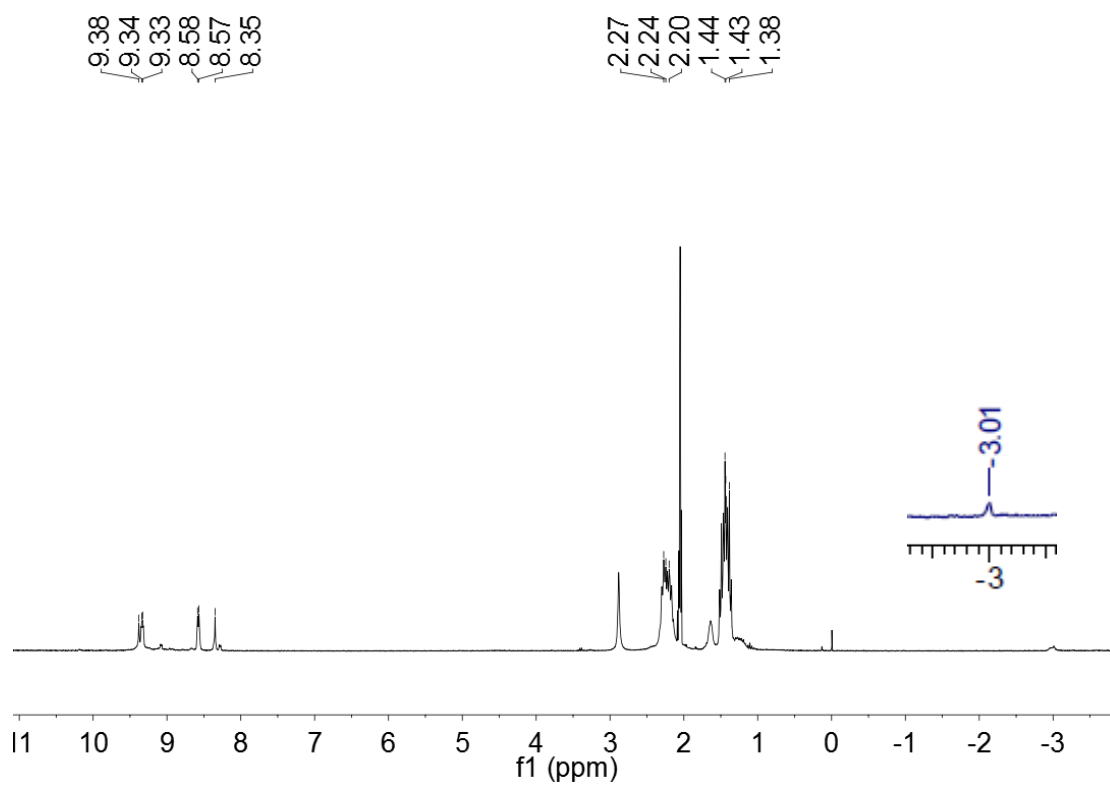

**Figure S3.**  $^1\text{H}$  NMR (acetone- $d_6$ , 300 MHz) spectrum of **4c**

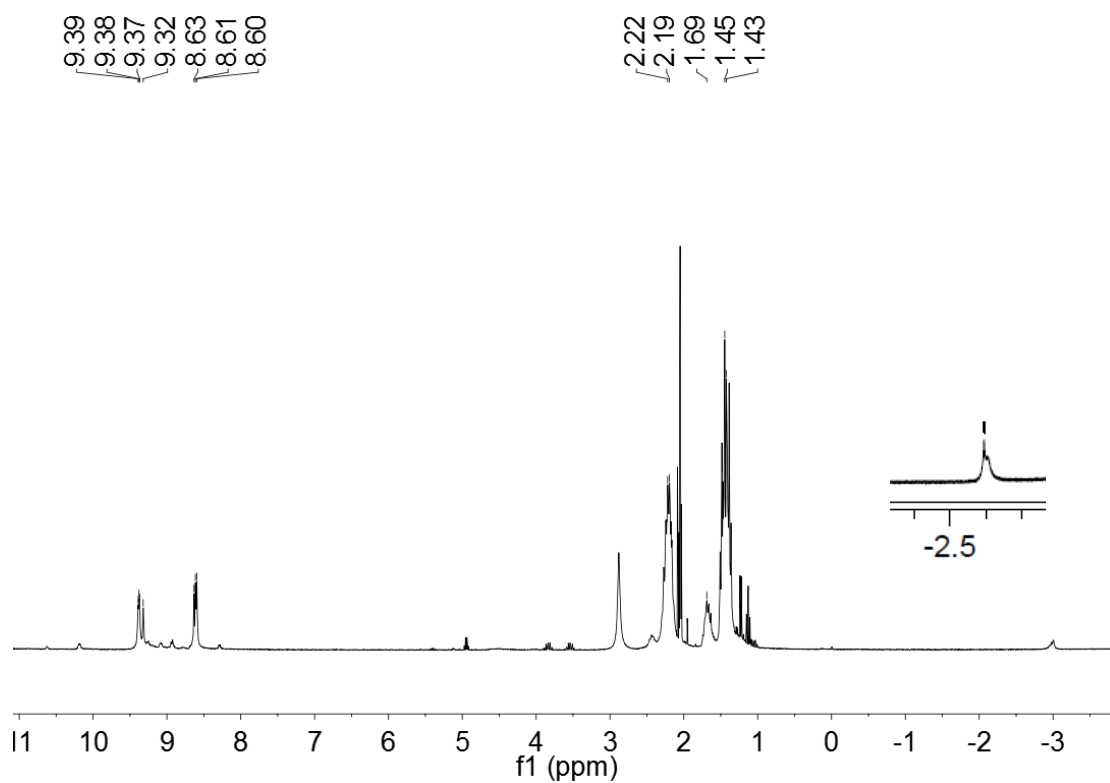

**Figure S4.**  $^1\text{H}$  NMR (acetone- $d_6$ , 300 MHz) spectrum of **4d**

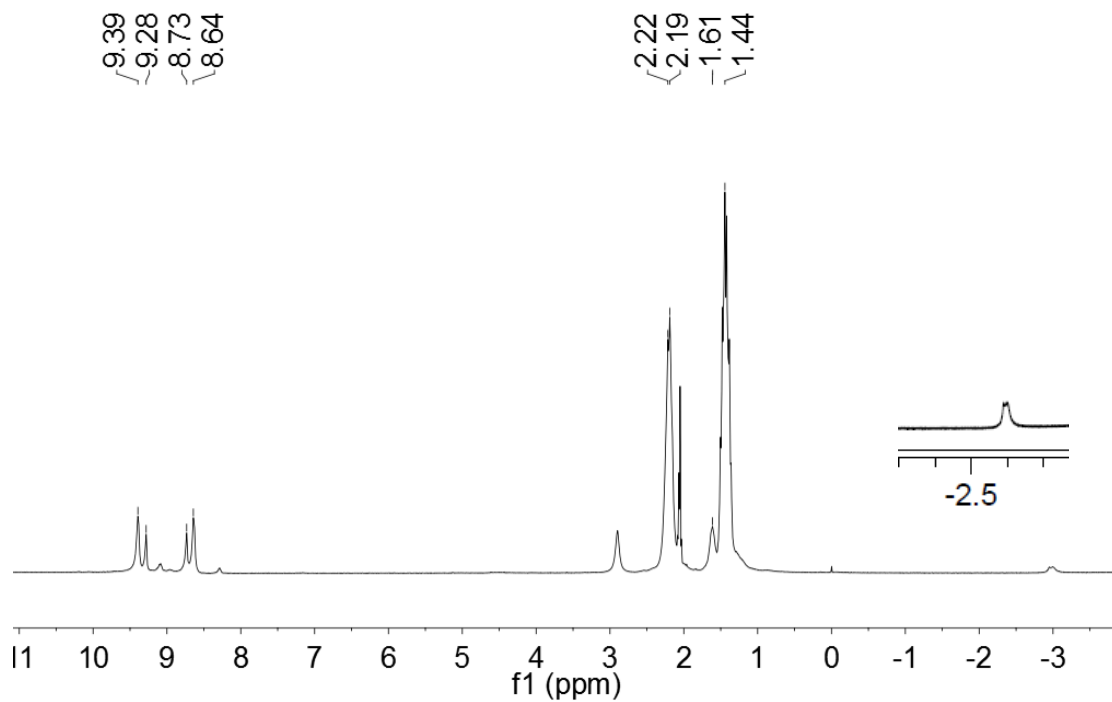

**Figure S5.**  $^1\text{H}$  NMR (acetone- $d_6$ , 300 MHz) spectrum of **4e**

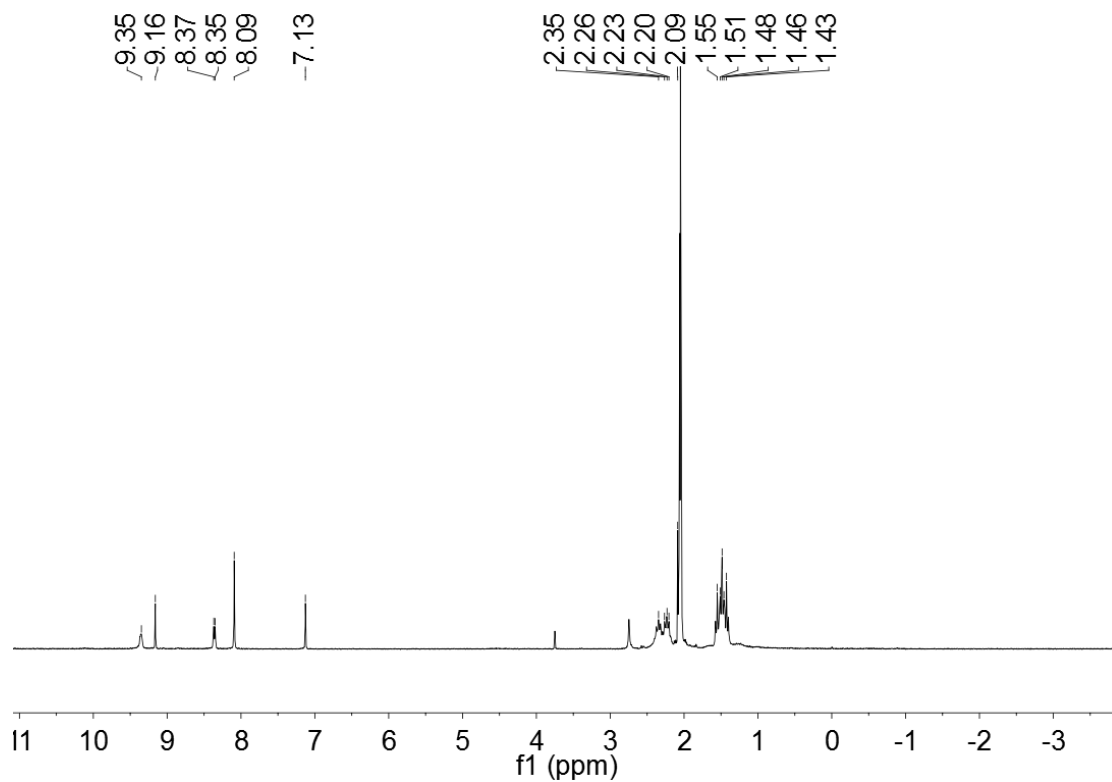

**Figure S6.**  $^1\text{H}$  NMR (acetone- $d_6$ , 300 MHz) spectrum of **5a**

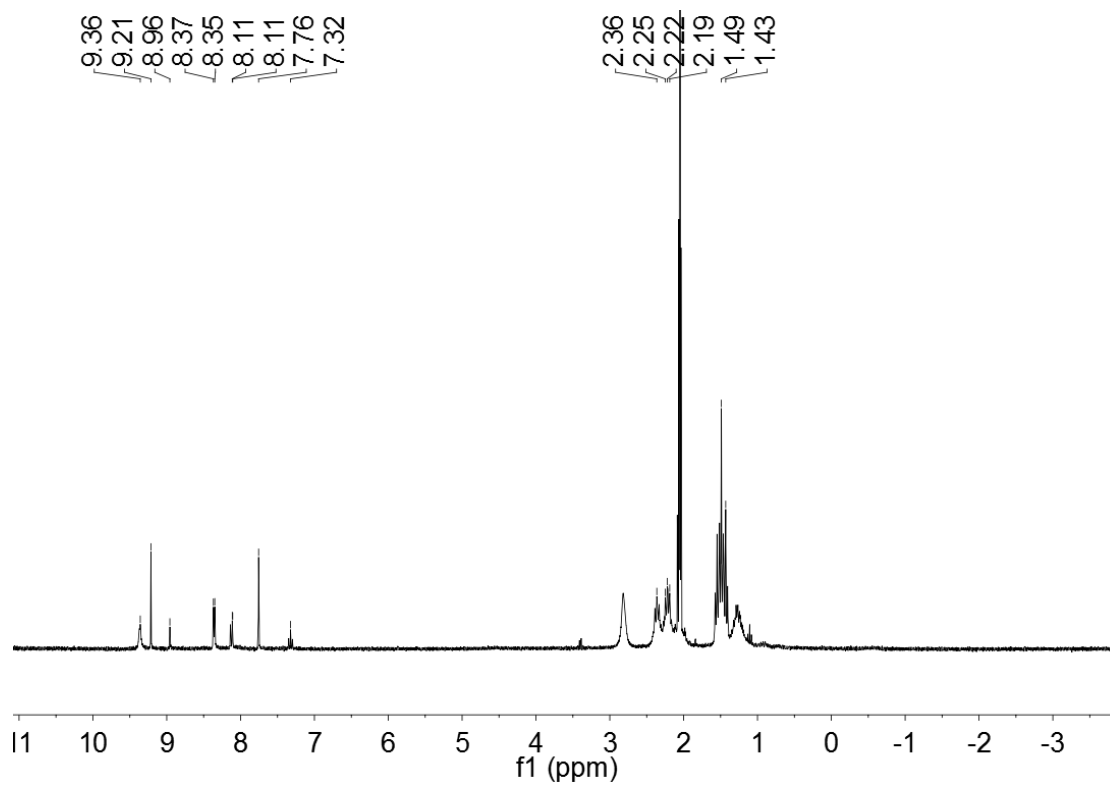

**Figure S7.**  $^1\text{H}$  NMR (acetone- $d_6$ , 300 MHz) spectrum of **5b**

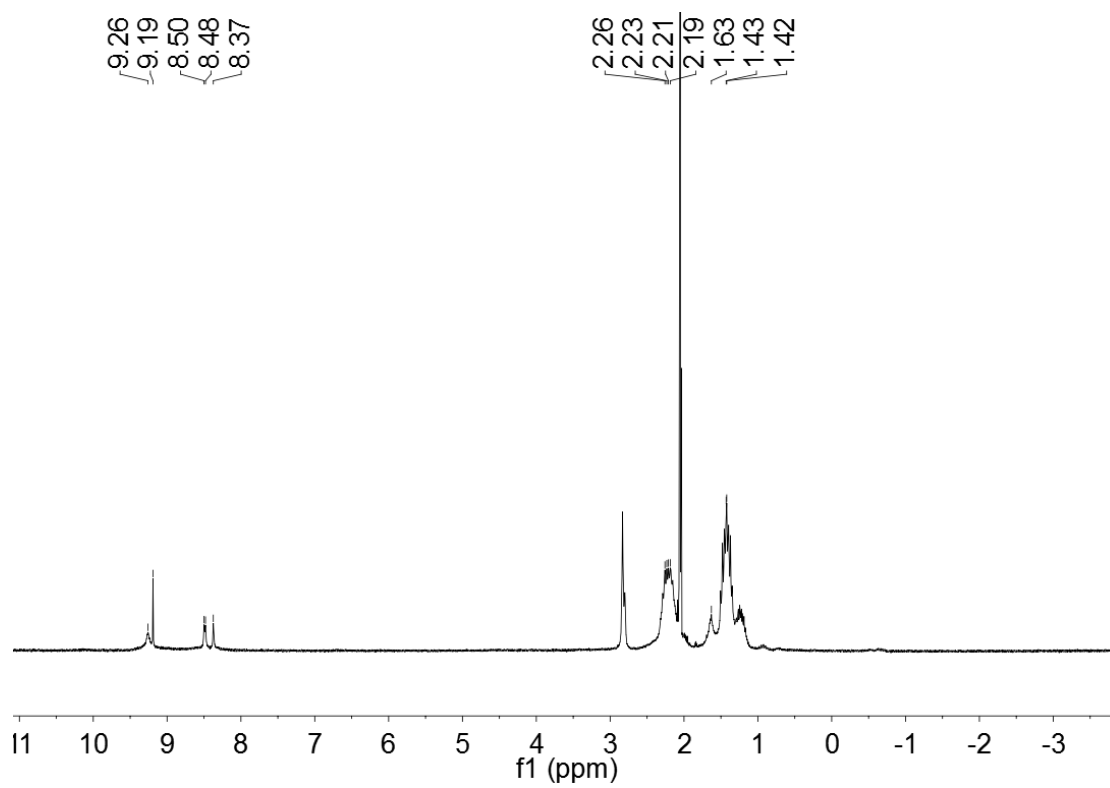

**Figure S8.**  $^1\text{H}$  NMR (acetone- $d_6$ , 300 MHz) spectrum of **5c**

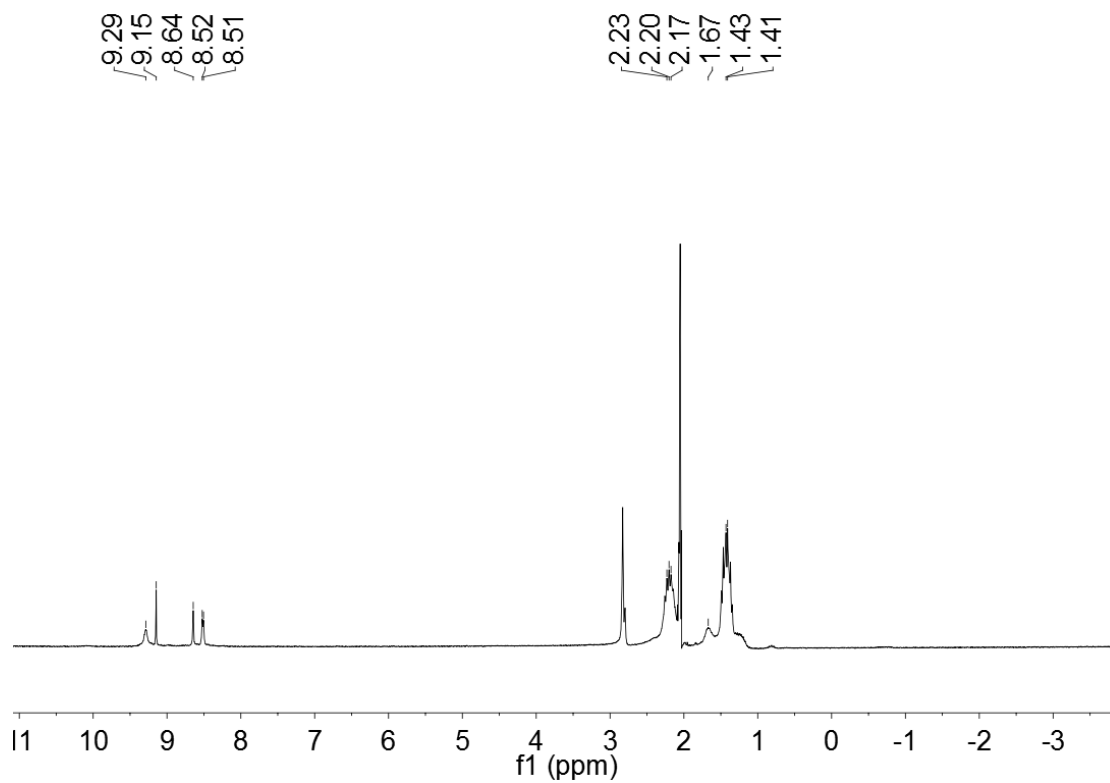

**Figure S9.**  $^1\text{H}$  NMR (acetone- $d_6$ , 300 MHz) spectrum of **5d**

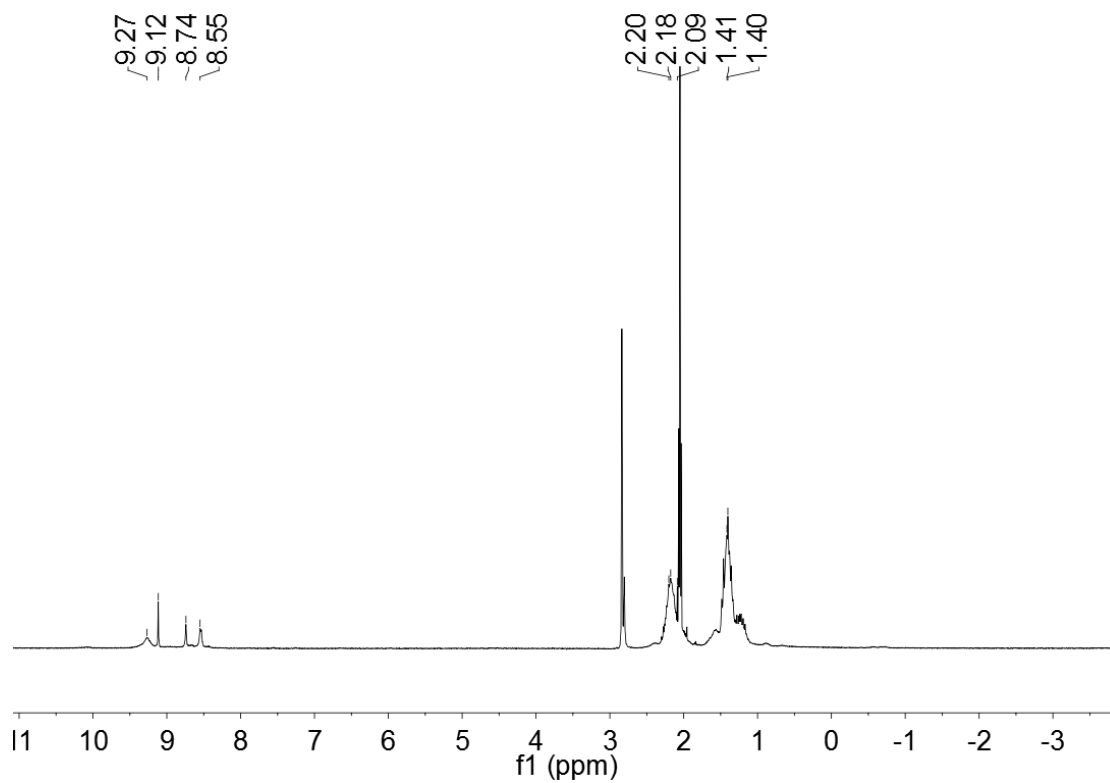

**Figure S10.**  $^1\text{H}$  NMR (acetone- $d_6$ , 300 MHz) spectrum of **5e**

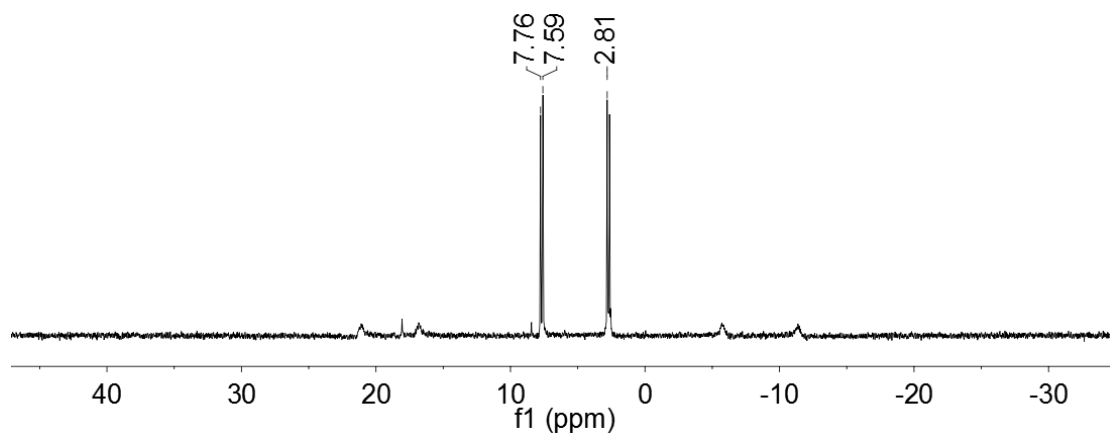

**Figure S11.**  $^{31}\text{P}\{^1\text{H}\}$  spectrum of **4a**

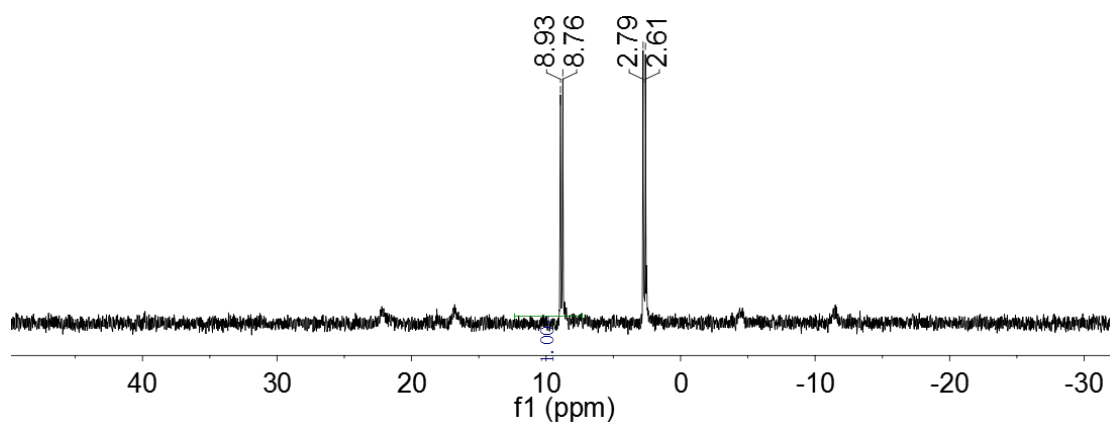

**Figure S12.**  $^{31}\text{P}\{^1\text{H}\}$  spectrum of **4b**

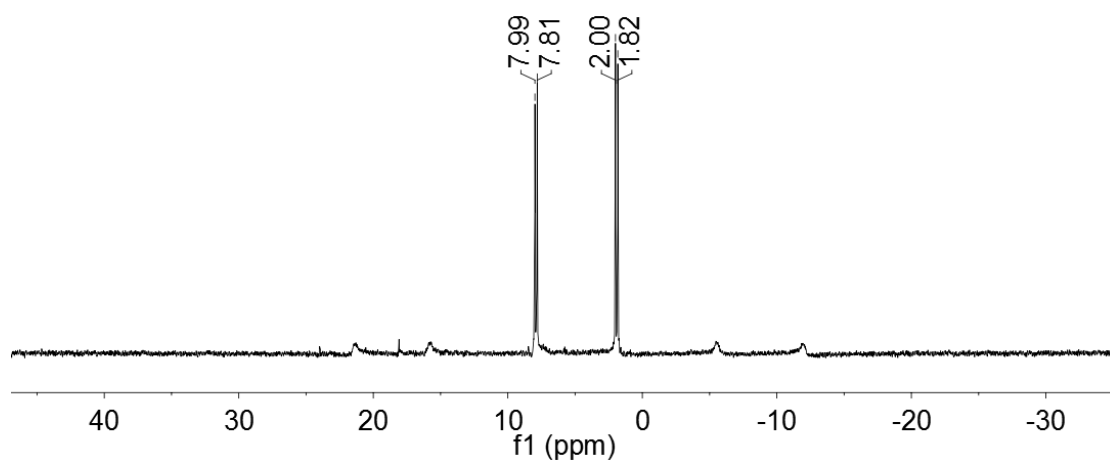

**Figure S13.**  $^{31}\text{P}\{^1\text{H}\}$  spectrum of **4c**

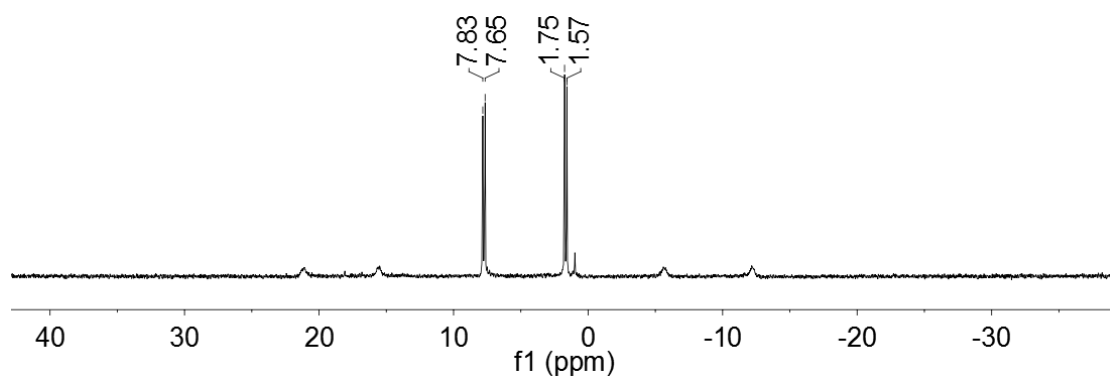

**Figure S14.**  $^{31}\text{P}\{^1\text{H}\}$  spectrum of **4d**

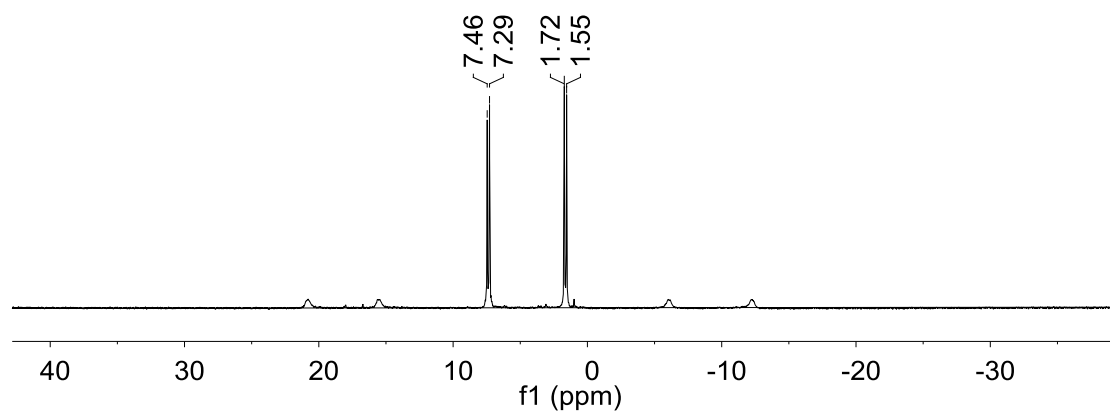

**Figure S15.**  $^{31}\text{P}\{^1\text{H}\}$  spectrum of **4e**

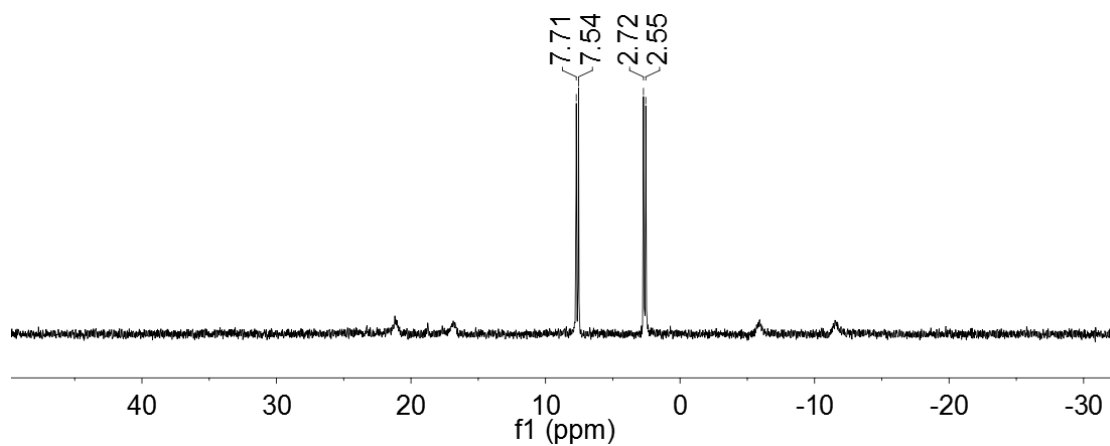

**Figure S16.**  $^{31}\text{P}\{^1\text{H}\}$  spectrum of **5a**



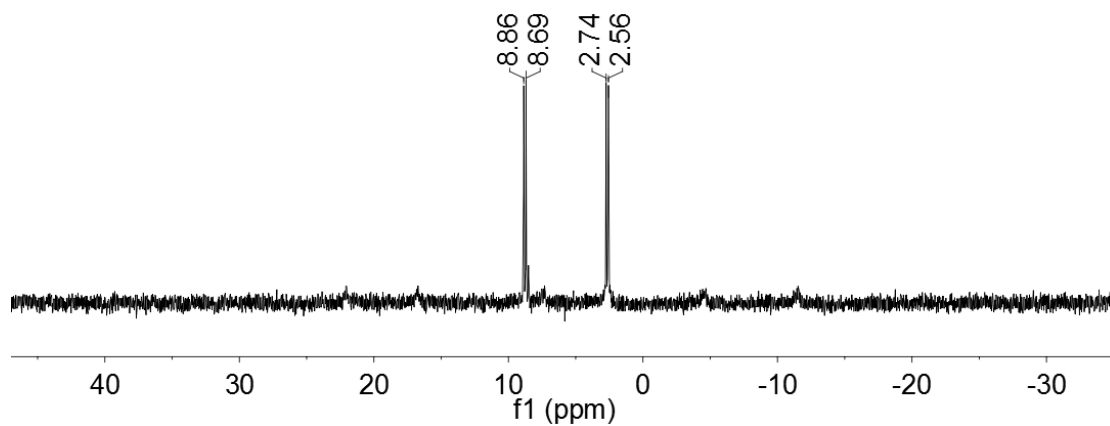

**Figure S17.**  $^{31}\text{P}\{^1\text{H}\}$  spectrum of **5b**

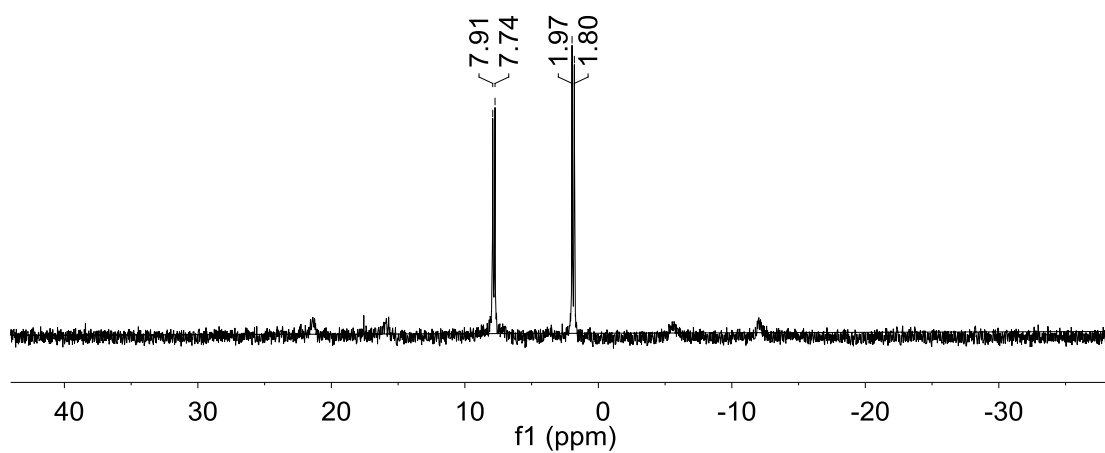

**Figure S18.**  $^{31}\text{P}\{^1\text{H}\}$  spectrum of **5c**

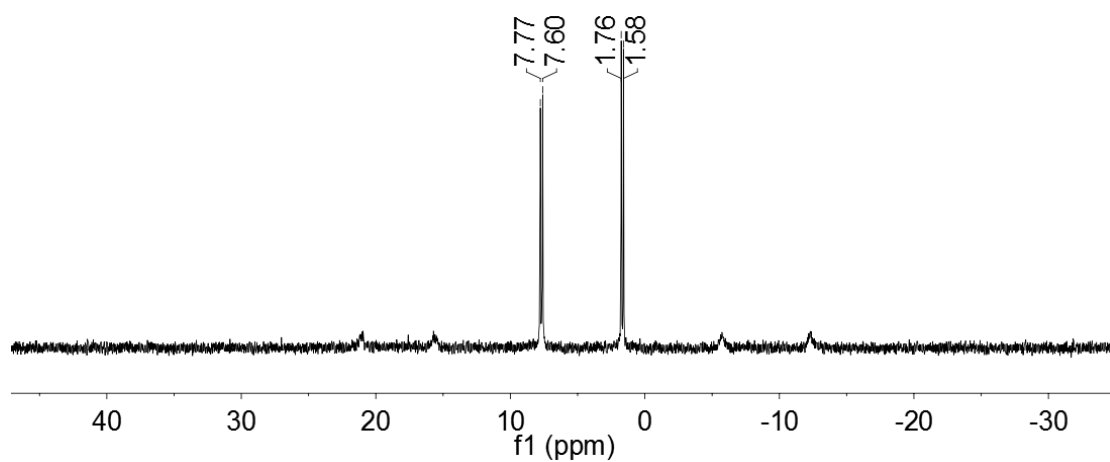

**Figure S19.**  $^{31}\text{P}\{^1\text{H}\}$  spectrum of **5d**

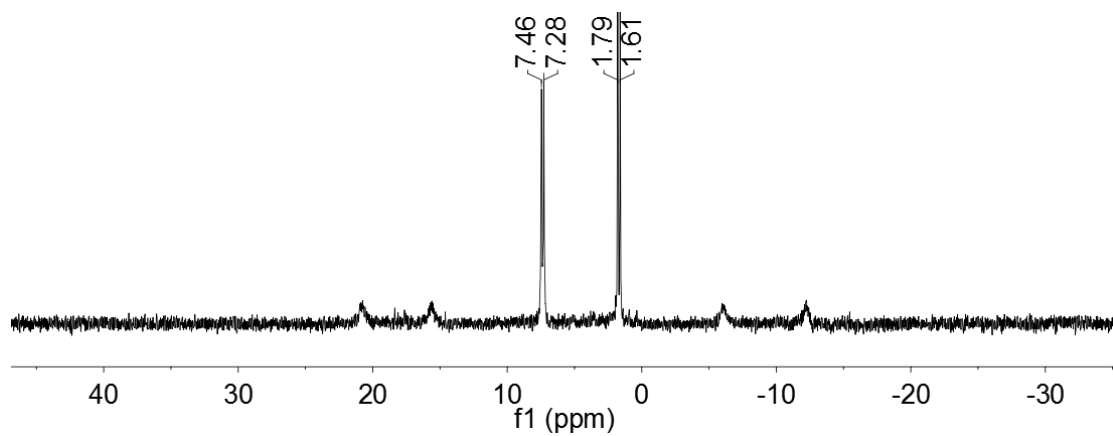

**Figure S20.**  $^{31}\text{P}\{^1\text{H}\}$  spectrum of **5e**

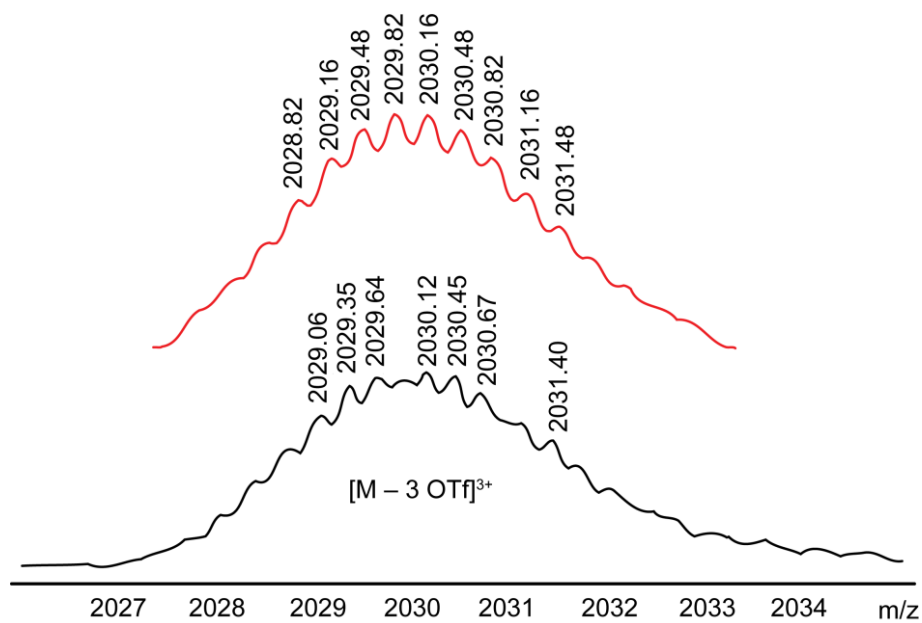

**Figure S21.** Calculated (red, top) and experimental (black, bottom) ESI-MS spectrum of  $[4a-3OTf]^{3+}$

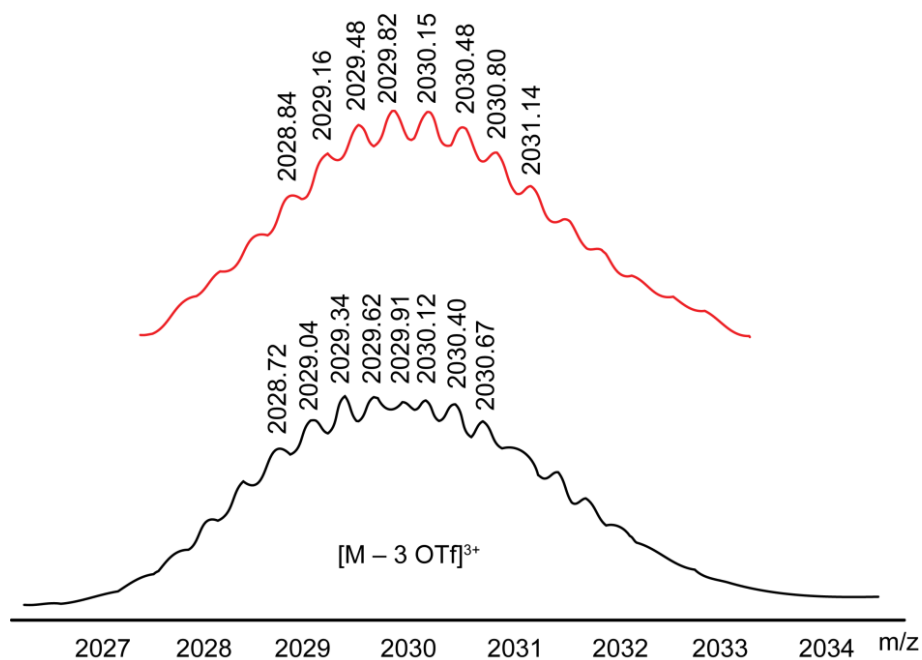

**Figure S22.** Calculated (red, top) and experimental (black, bottom) ESI-MS spectrum of  $[4b-3OTf]^{3+}$

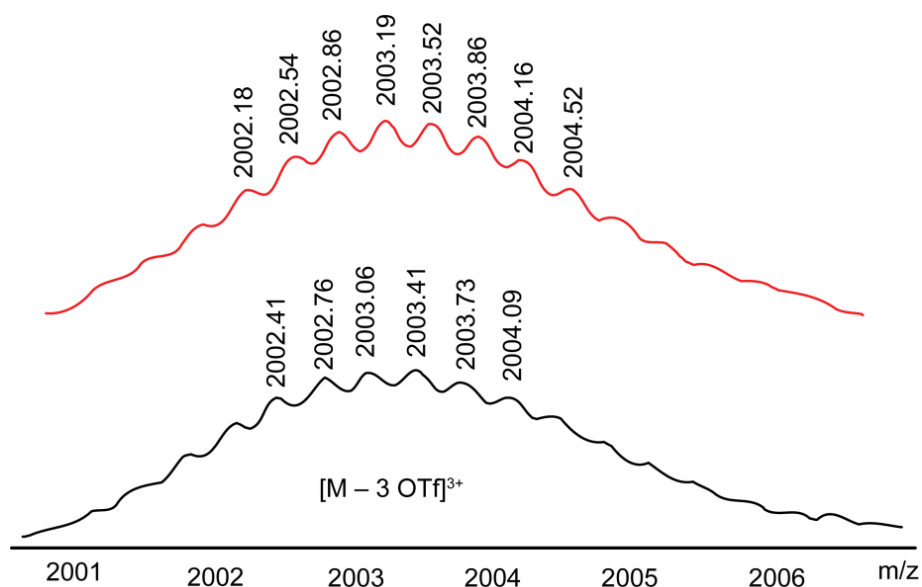

**Figure S23.** Calculated (red, top) and experimental (black, bottom) ESI-MS spectrum of  $[4c-3OTf]^{3+}$

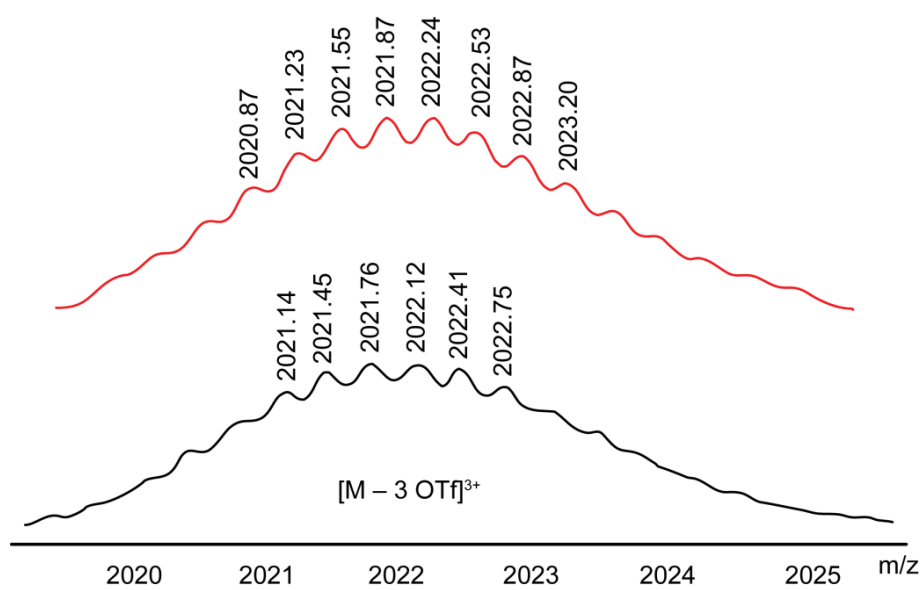

**Figure S24.** Calculated (red, top) and experimental (black, bottom) ESI-MS spectrum of  $[4d-3OTf]^{3+}$

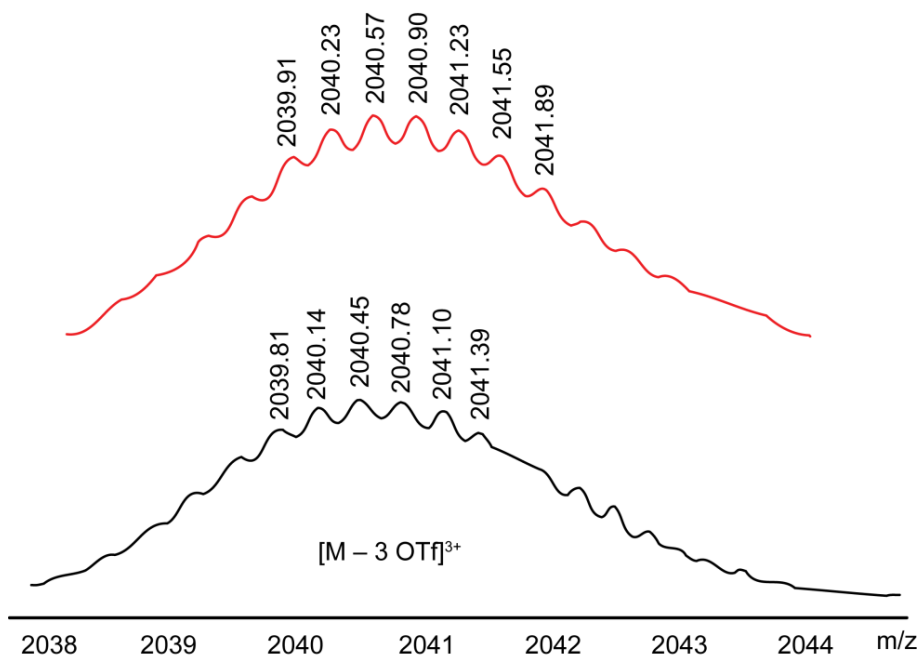

**Figure S25.** Calculated (red, top) and experimental (black, bottom) ESI-MS spectrum of  $[4e-3OTf]^{3+}$

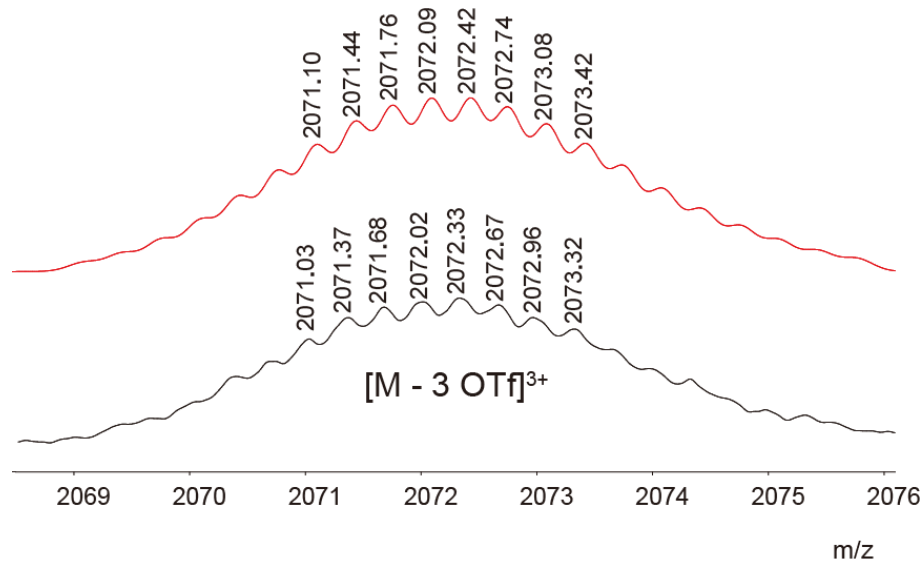

**Figure S26.** Calculated (red, top) and experimental (black, bottom) ESI-MS spectrum of  $[5a-3OTf]^{3+}$

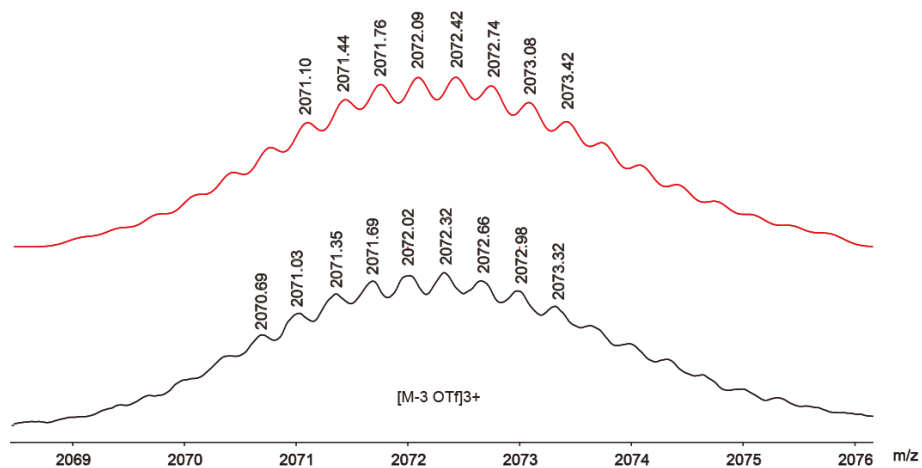

**Figure S27.** Calculated (red, top) and experimental (black, bottom) ESI-MS spectrum of  $[5b-3OTf]^{3+}$

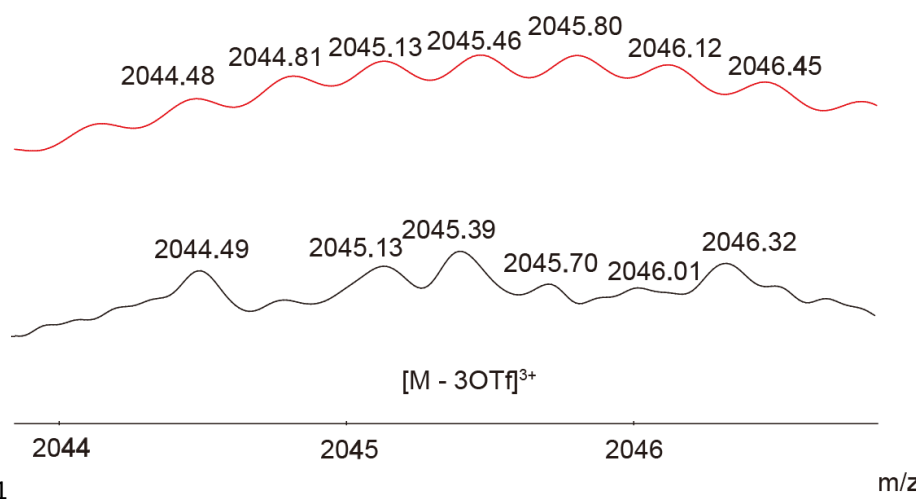

**Figure S28.** Calculated (red, top) and experimental (black, bottom) ESI-MS spectrum of  $[5c-3OTf]^{3+}$

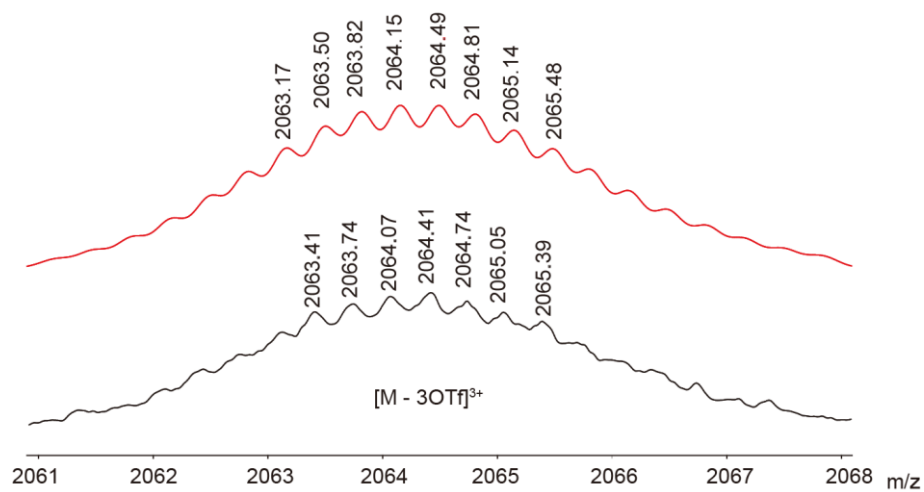

**Figure S29.** Calculated (red, top) and experimental (black, bottom) ESI-MS spectrum of  $[5d-3OTf]^{3+}$

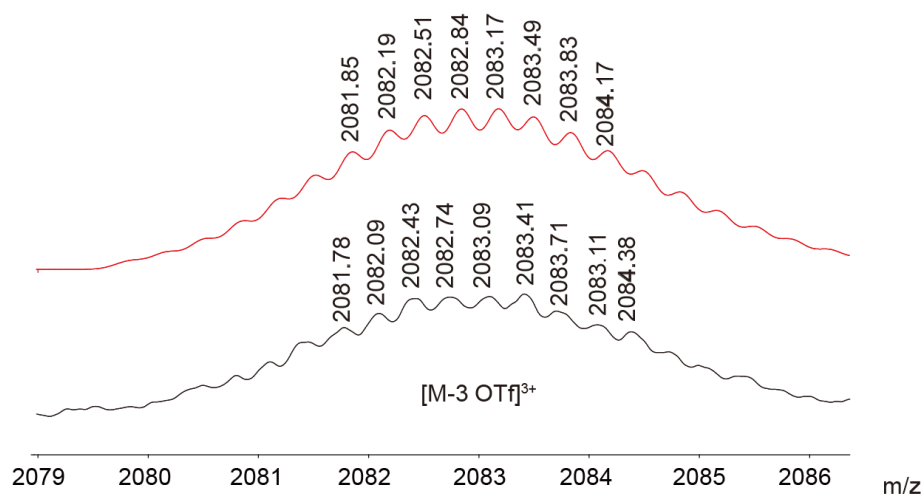

**Figure S30.** Calculated (red, top) and experimental (black, bottom) ESI-MS spectrum of  $[5e-3OTf]^{3+}$

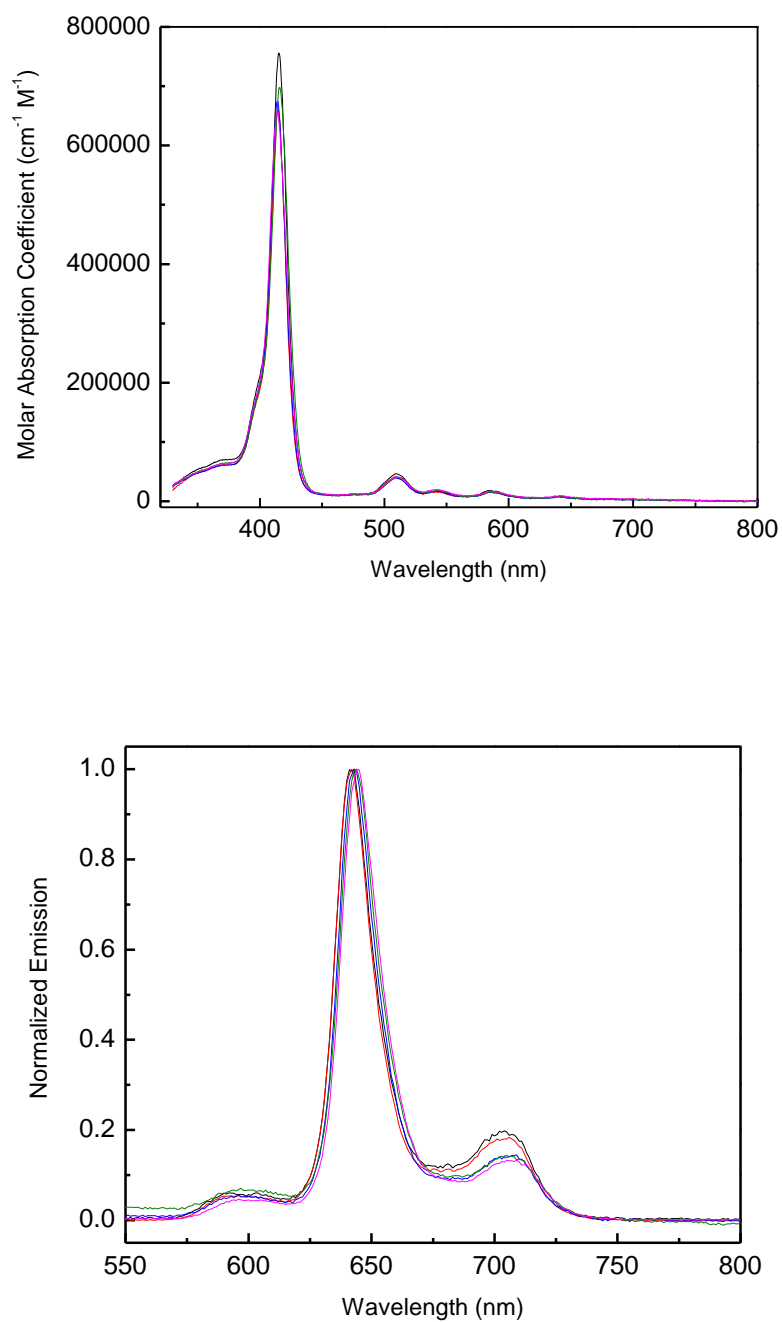

**Figure S31.** Absorption (top) and emission (bottom) profiles for **4a** (black), **4b** (red), **4c** (blue), **4d** (green) and **4e** (pink) in acetone



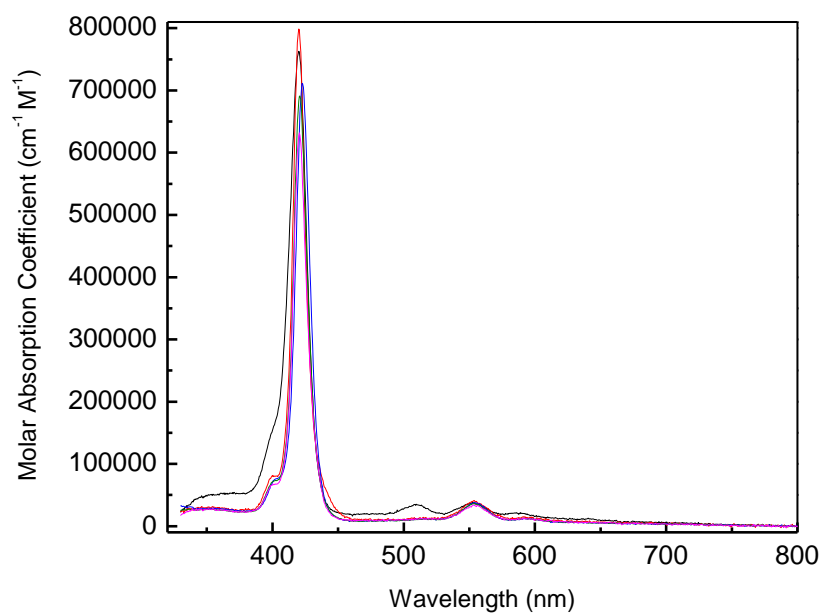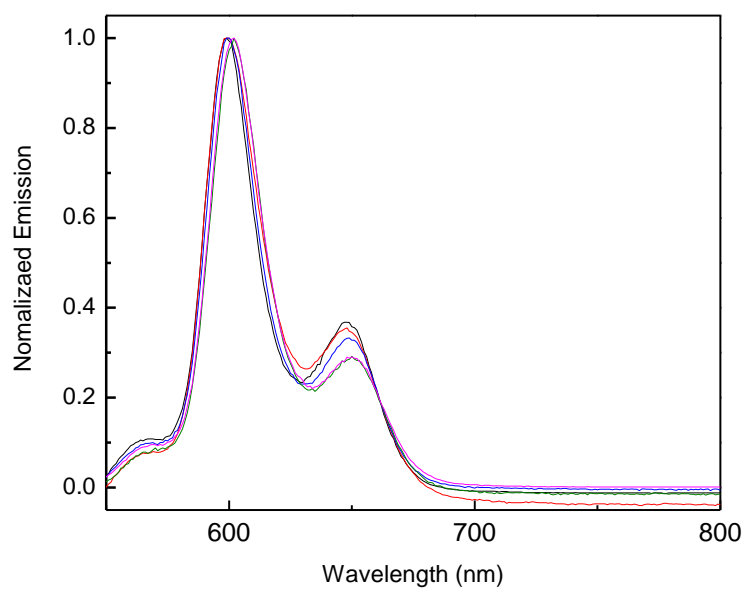

**Figure S32.** Absorption (top) and emission (bottom) profiles for **5a** (black), **5b** (red), **5c** (blue), **5d** (green) and **5e** (pink) in acetone
